# Supplementary material for: siRNA Targeting Mcl-1 Potentiates the Anticancer Activity of Andrographolide Nanosuspensions via Apoptosis in Breast Cancer Cells
Source: MDPI journal article supplement (doi:10.3390/pharmaceutics14061196), 2022-06-03
Supplement: s1 [file s1]

# Supplementary Materials: siRNA Targeting Mcl-1 Potentiates the Anticancer Activity of Andrographolide Nanosuspensions via Apoptosis in Breast Cancer cells

Supusson Pengnam, Purin Charoensuksai, Boon-ek Yingyongnarongkul, Rungnapha Saeeng, Hasan Uludağ, Prasopchai Patrojanasophon, Praneet Opanasopit and Samarwadee Plianwong

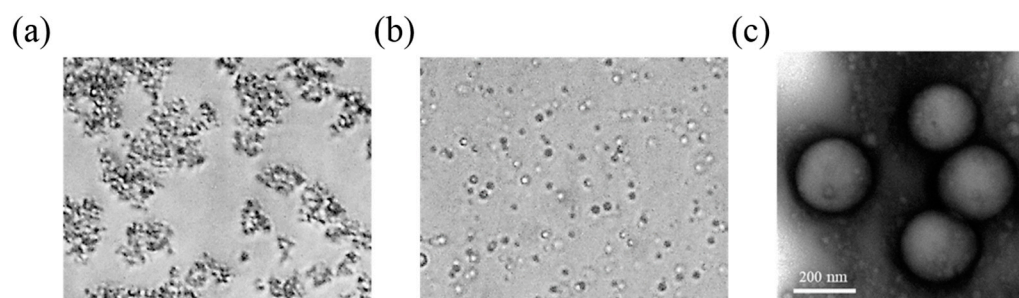

**Figure S1.** Morphology of (a) 3nAG suspension and (b) 3nAGN-NSC under 100X inverted microscope and (c) TEM image of 3nAGN-NSC.

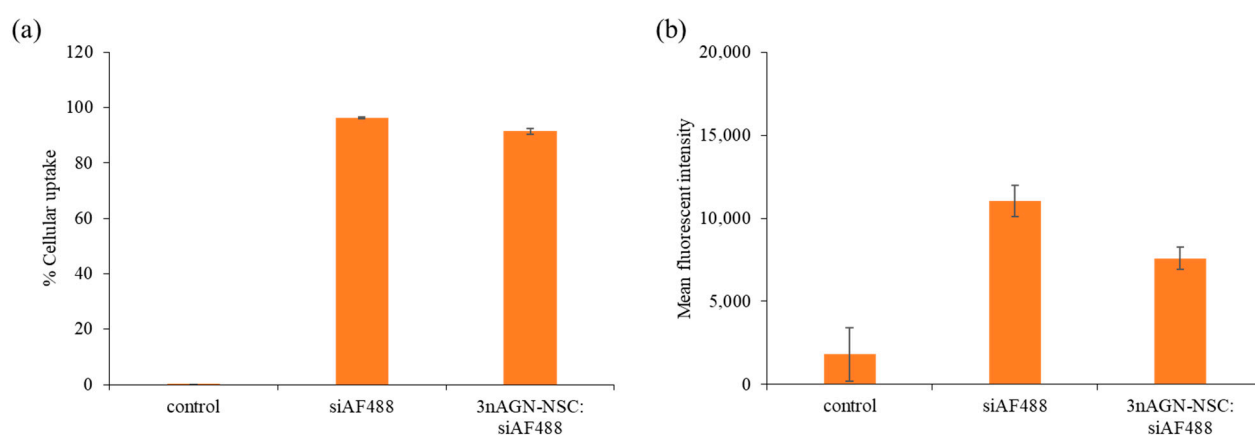

**Figure S2.** (a) Cellular uptake and (b) mean fluorescent intensity of siAF488 transfected with cationic niosomes and siAF488 in the combination with 3nAGN-NSC in MCF-7 cells.

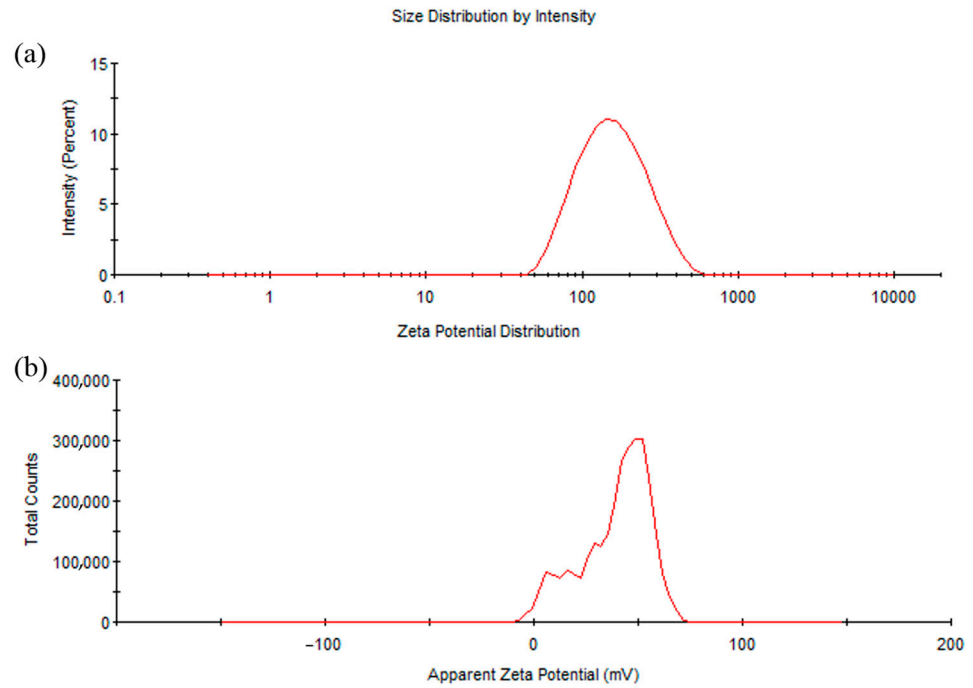

**Figure S3.** Characterization of cationic niosomes: (a) size distribution (mean particle size of  $150.50 \pm 5.52$  nm) and (b) zeta potential distribution (mean zeta potential of  $+39.10 \pm 1.89$  mV) obtained from the Zetasizer Nano ZS.

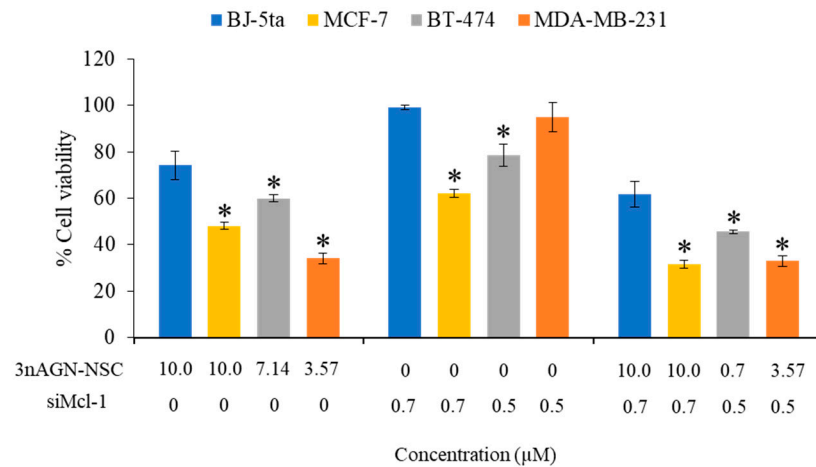

**Figure S4.** The cell viability of a single treatment with 3nAGN-NSC or siMcl-1 and the combination of 3nAGN-NSC: siMcl-1 (The tested concentration was nearly the IC<sub>50</sub> of 3nAGN-NSC in each breast cancer cell) in normal human fibroblast cells (BJ-5ta cells), and breast cancer cells (MCF-7, BT-474 and MDA-MB-231 cells), which was examined by MTT assay. The cell was tested in the same condition with the method section 4.5. The BJ-5ta cells were maintained in DMEM containing 10% FBS, 1% L-glutamine, 1% non-essential amino acids solution, 100 U/ml penicillin, and 100 mg/ml streptomycin at 80% confluency before seeding. \*The data is significantly different from BJ-5ta ( $p < 0.05$ ).

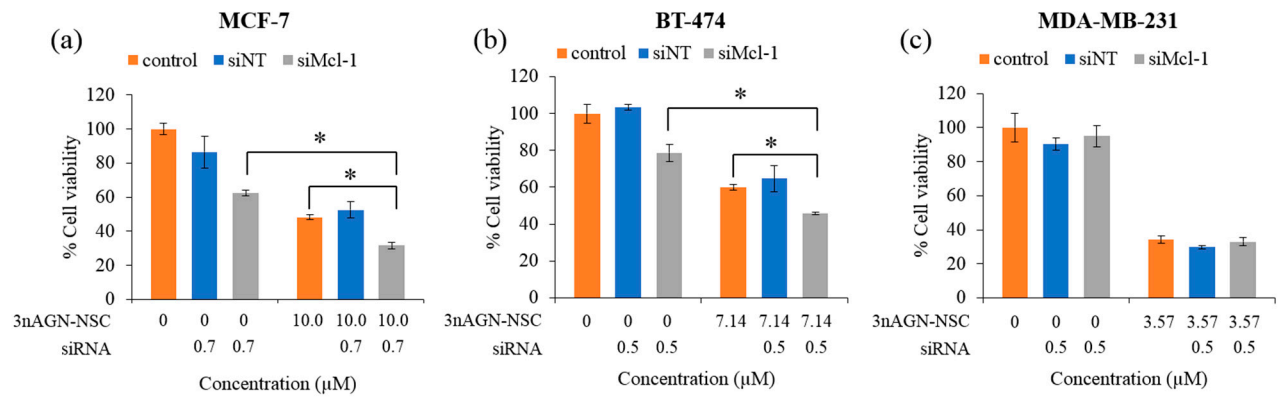

**Figure S5.** The cell viability of (a) MCF-7 with the combination 3nAGN-NSC: siMcl-1 (100: 0.07, 10 and 0.07 μM, respectively), (b) BT-474 after treatment with the combination 3nAGN-NSC: siMcl-1 (100: 0.07, 7.14 and 0.05 μM, respectively) and (c) MDA-MB-231 after treatment with the combination 3nAGN-NSC: siMcl-1 (50: 0.07, 3.57 and 0.05 μM, respectively). \*The data is significantly different ( $p < 0.05$ ).
